# Supplementary figures and images for: Systemic Gene Delivery in Large Species for Targeting Spinal Cord, Brain, and Peripheral Tissues for Pediatric Disorders
Source: PubMed Central journal article supplement — Mol Ther. 2011 Aug 2;19(11):1971–80. doi: 10.1038/mt.2011.157 (PMC3222525; doi:10.1038/mt.2011.157), 2011-08-02

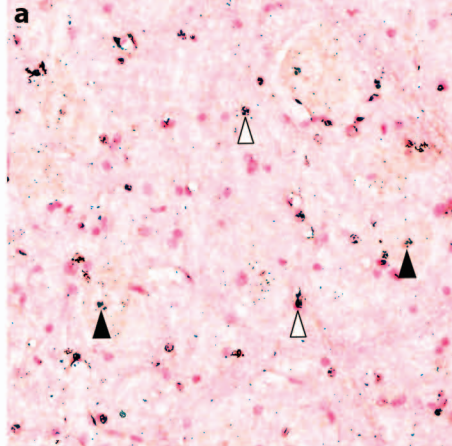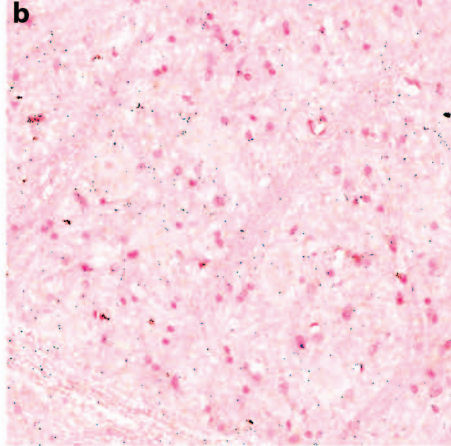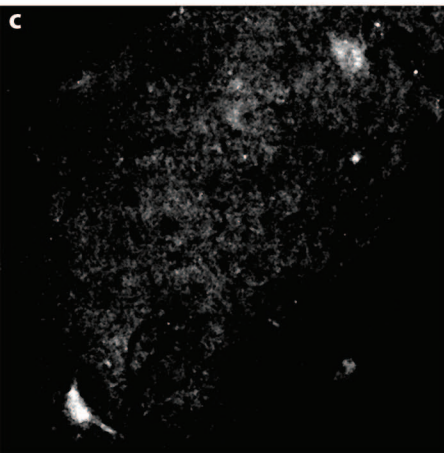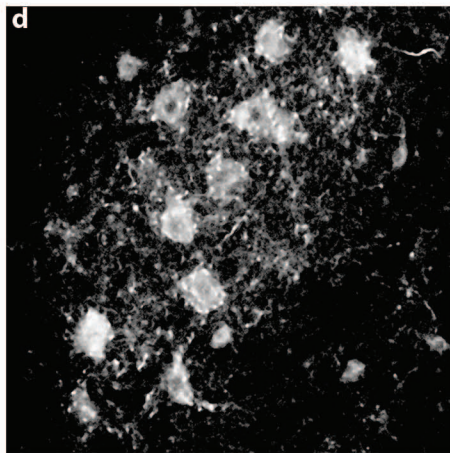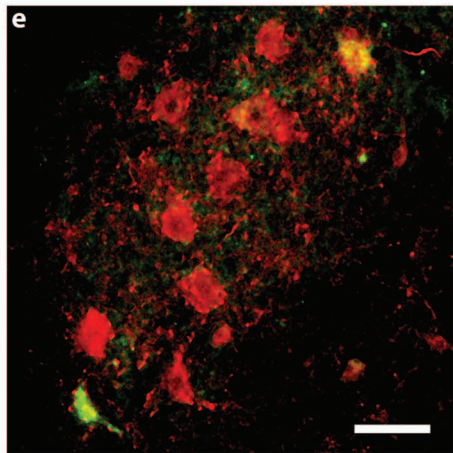

Supplement: mt2011157x2.pdf [file mt2011157x2.pdf]
